# Supplementary material for: Engineering VOx structure by integrating oxygen vacancies for improved zinc-ion storage based on cation-doping regulation with electric density
Source: Royal Society of Chemistry journal article supplement (doi:10.1039/d4dt01415d), 2024-01-01
Supplement: d4dt01415d1.pdf [file d4dt01415d1.pdf]

**Engineering of VO<sub>x</sub> structure integrating oxygen vacancies for improved zinc ions storage  
based on cations doping regulation with electric density**

Juan Xu\*, Nengneng Han, Sihao Chen, Yahui Zhang, Yuezhou Jing, Pibin Bing, Zhongyang Li\*  
School of Electrical College, North China University of Water Resources and Electric Power,  
Zhengzhou 450045, P. R. China

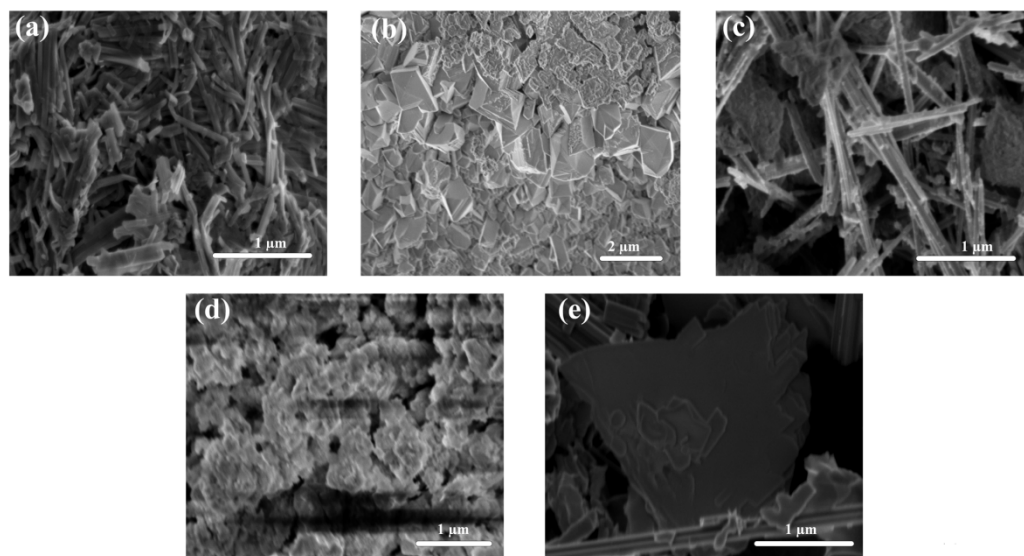

**Fig. S1** (a,b,c,d,e) SEM images of K-VO<sub>x</sub>, Fe-VO<sub>x</sub>, Sn-VO<sub>x</sub>, Nb-VO<sub>x</sub> and W-VO<sub>x</sub> compounds, respectively.

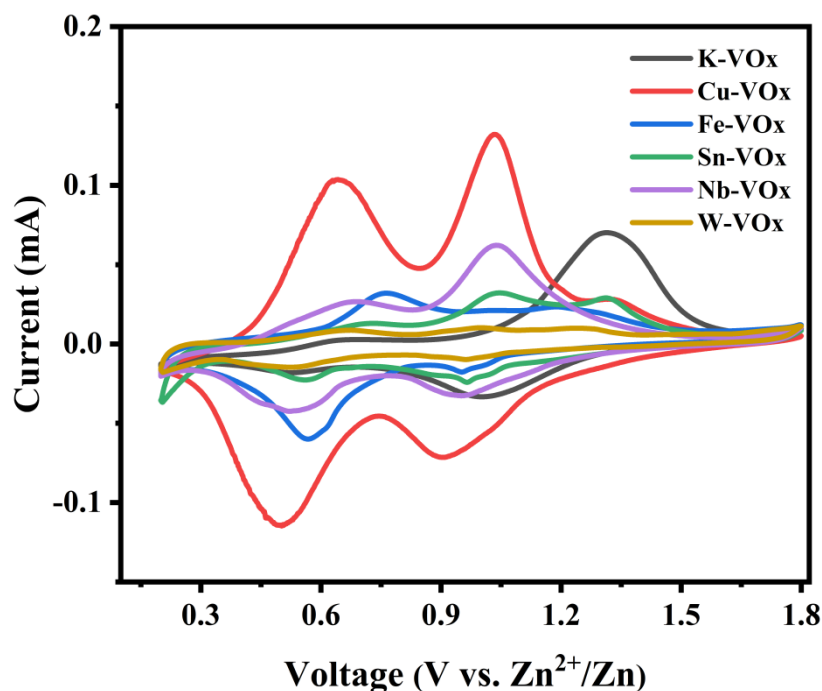

**Fig. S2** CV curves of K-VO<sub>x</sub>, Cu-VO<sub>x</sub>, Fe-VO<sub>x</sub>, Sn-VO<sub>x</sub>, Nb-VO<sub>x</sub> and W-VO<sub>x</sub> electrodes at the scan rate of 0.1 mV s<sup>-1</sup>, respectively.

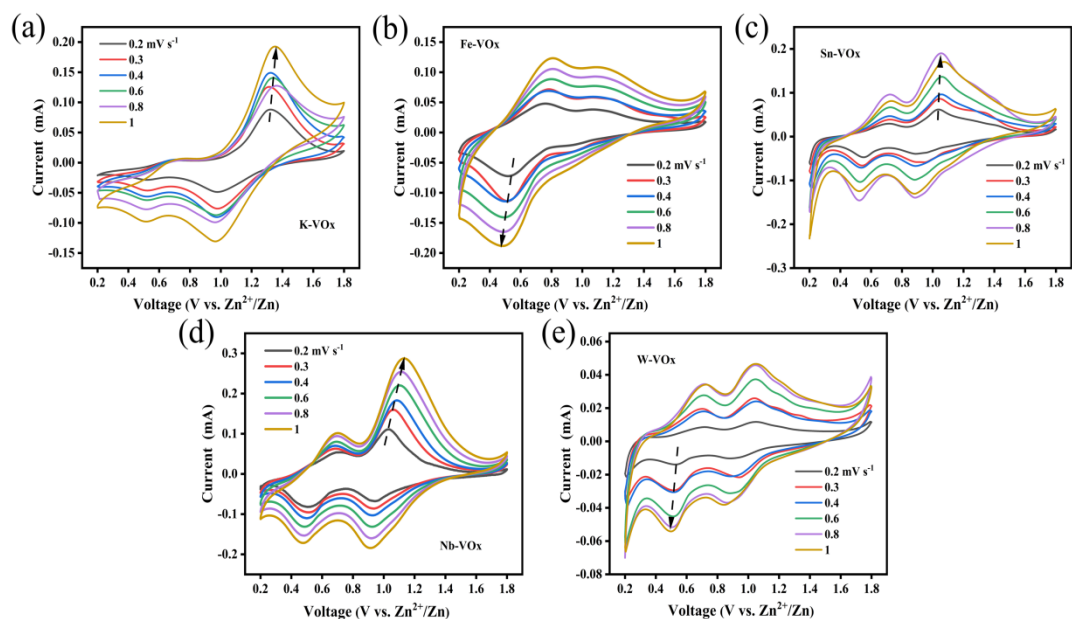

**Fig. S3** (a,b,c,d,e) CV curves of K-VO<sub>x</sub>, Fe-VO<sub>x</sub>, Sn-VO<sub>x</sub>, Nb-VO<sub>x</sub> and W-VO<sub>x</sub> electrodes at various scan rates from 0.2 to 1 mV s<sup>-1</sup>, respectively.

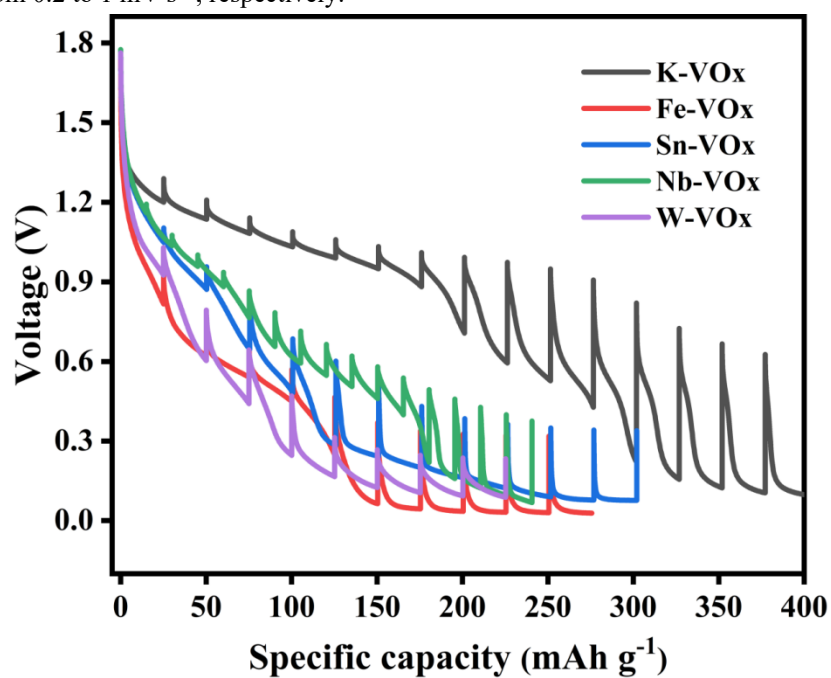

**Fig. S4** Discharging GITT curves of K-VO<sub>x</sub>, Fe-VO<sub>x</sub>, Sn-VO<sub>x</sub>, Nb-VO<sub>x</sub> and W-VO<sub>x</sub> electrodes, respectively.
